# Supplementary material for: Differences in the Tumor Microenvironment of EBV-Associated Gastric Cancers Revealed Using Single-Cell Transcriptome Analysis
Source: MDPI journal article supplement (doi:10.3390/cancers15123178), 2023-06-14
Supplement: s1 [file s1]

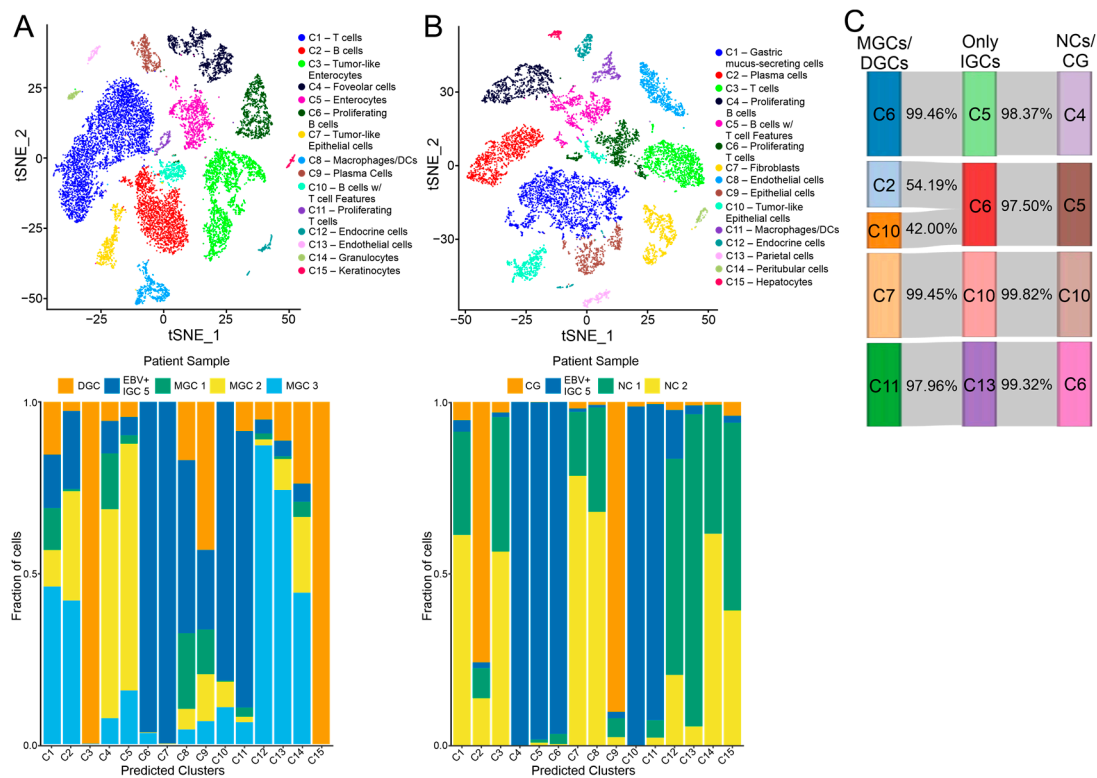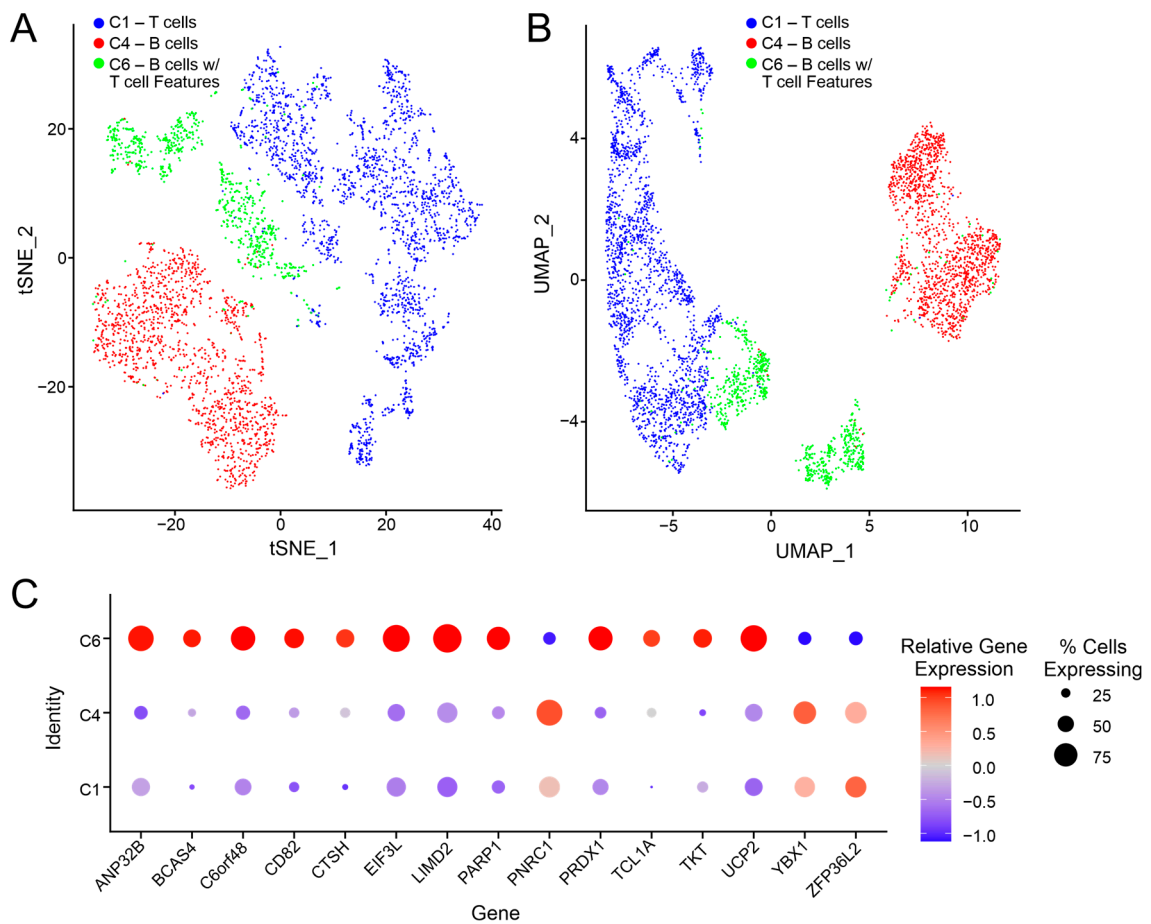

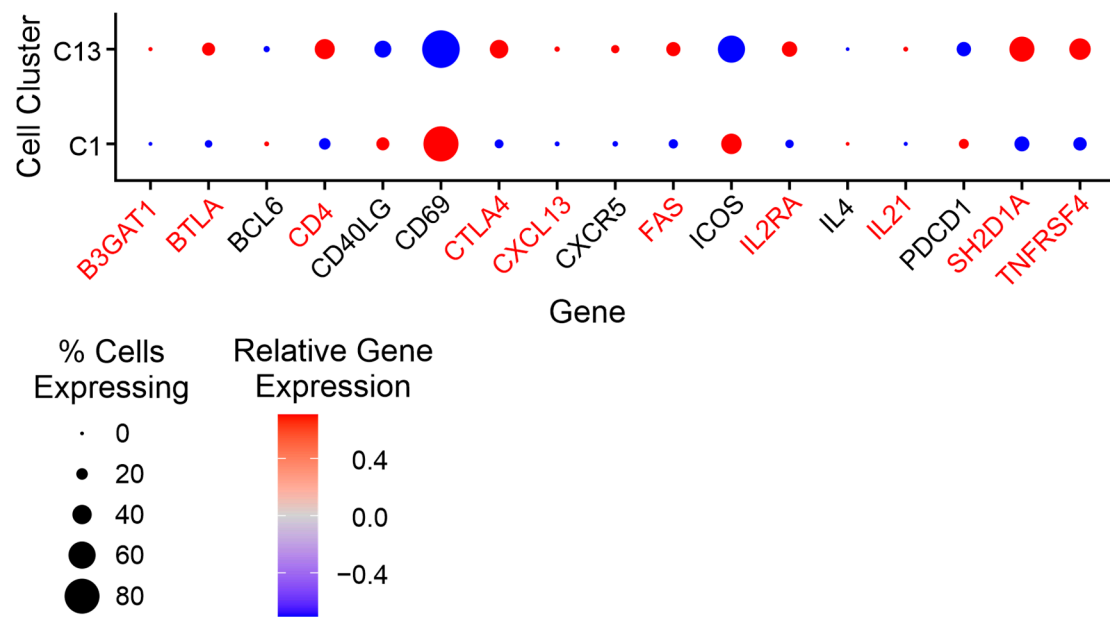

**Figure S3.** Dot plot of the Tfh marker gene expression across the C1 and C13 clusters.

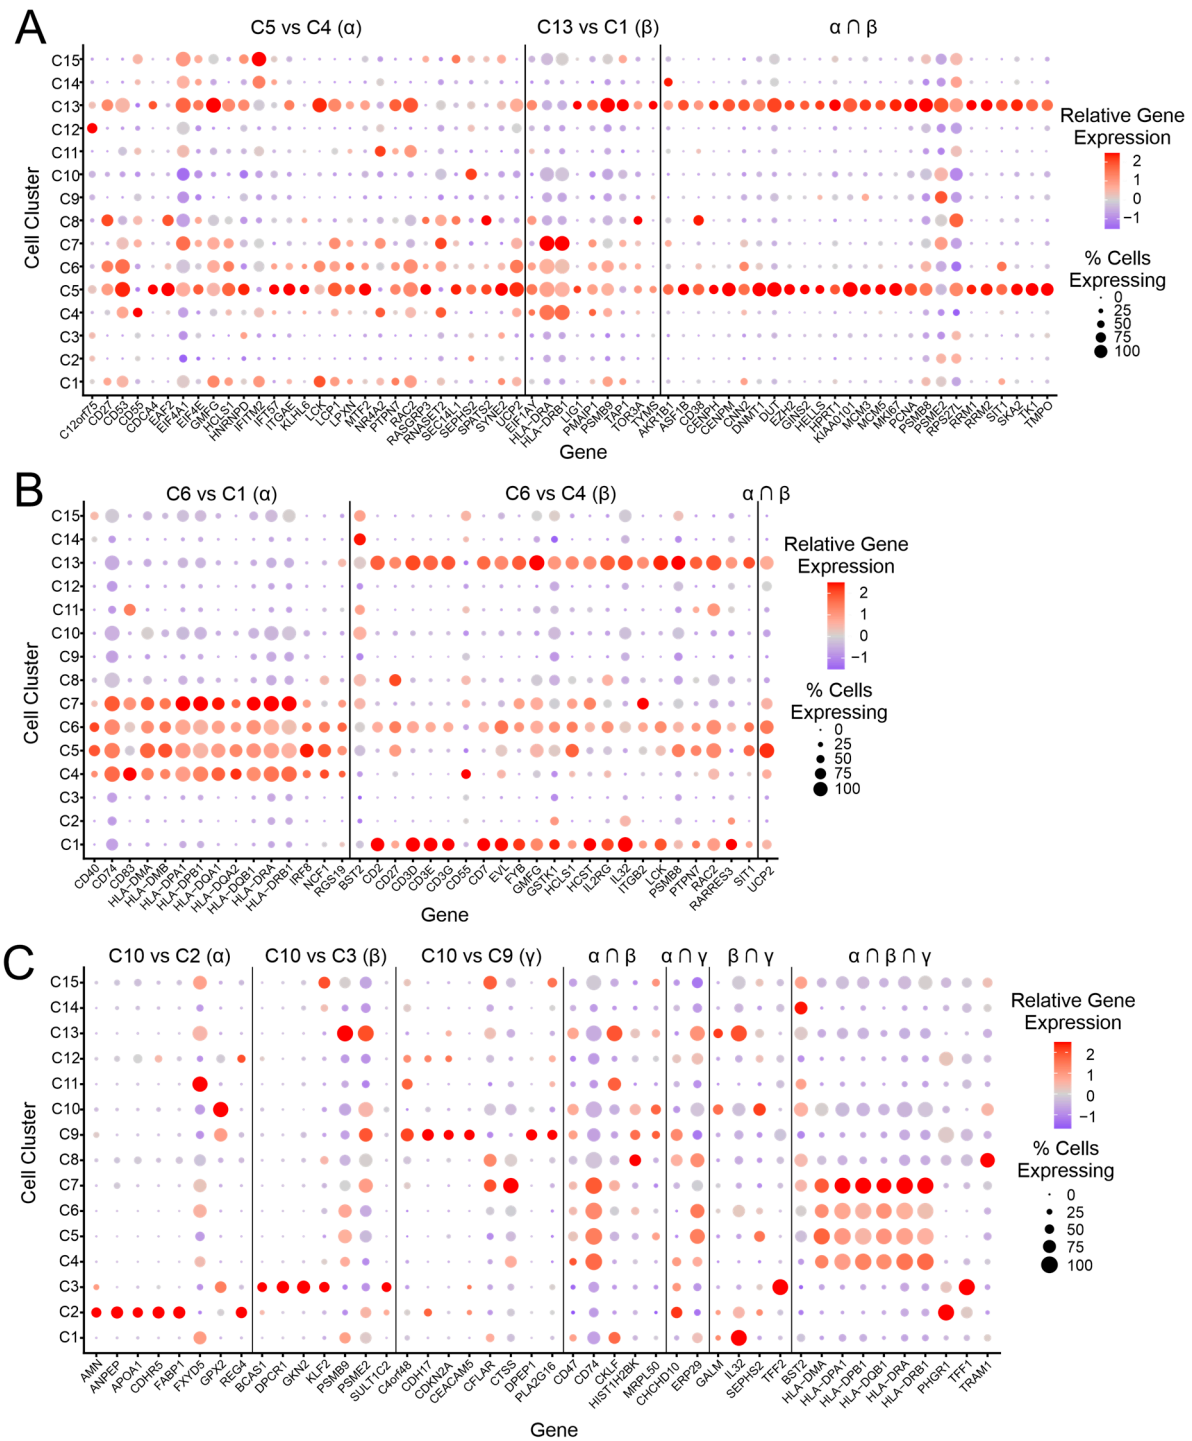

**Figure S4.** (A–C) Dot plots of genes consistently, differentially expressed between EBV-positive IGCs and EBV-negative IGCs.

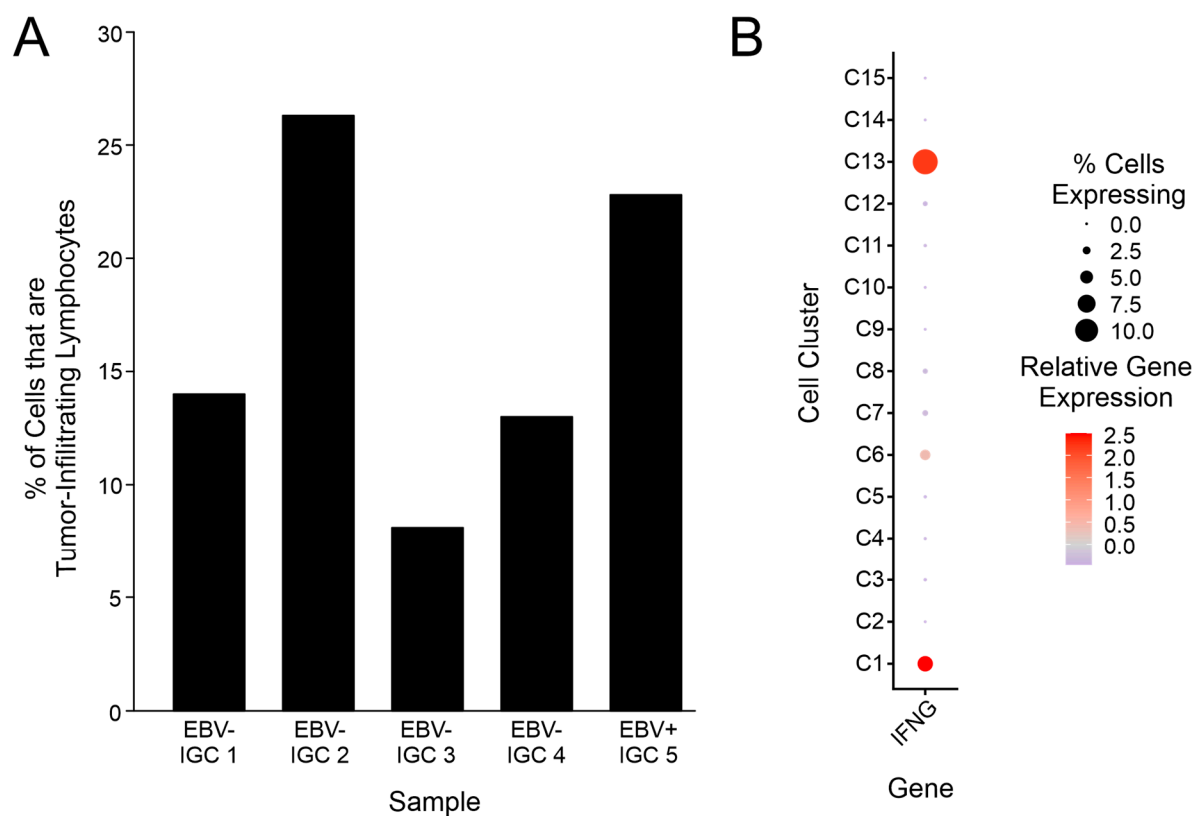

**Figure S5.** (A,B) T cell prevalence and expression of IFN- $\gamma$  in the single-cell data.
